# Triplications of human chromosome 21 orthologous regions in mice result in expansion of megakaryocyte-erythroid progenitors and reduction of granulocyte-macrophage progenitors

Chunhong Liu<sup>1,\*</sup>, Tao Yu<sup>1,2,\*</sup>, Zhuo Xing<sup>1,\*</sup>, Xiaoling Jiang<sup>1,\*</sup>, Yichen Li<sup>1</sup>, Annie Pao<sup>1</sup>, Justin Mu<sup>1</sup>, Paul K. Wallace<sup>3</sup>, George Stoica<sup>4</sup>, Andrei V. Bakin<sup>5</sup> and Y. Eugene Yu<sup>1,6</sup>

<sup>1</sup>The Children's Guild Foundation Down Syndrome Research Program, Genetics and Genomics Program and Department of Cancer Genetics and Genomics, Roswell Park Cancer Institute, Buffalo, NY 14263, USA

<sup>2</sup>Department of Medical Genetics, Tongji Medical College, Huazhong University of Science and Technology, Wuhan, Hubei 430030, China

<sup>3</sup>Department of Flow and Image Cytometry, Roswell Park Cancer Institute, Buffalo, NY 14263, USA

<sup>4</sup>Department of Pathobiology, Texas A&M University, College Station, TX 77843, USA

<sup>5</sup>Genetics and Genomics Program and Department of Cancer Genetics and Genomics, Roswell Park Cancer Institute, Buffalo, NY 14263, USA

<sup>6</sup>Genetics, Genomics and Bioinformatics Program, State University of New York at Buffalo, Buffalo, NY 14263, USA

\* Co-first authors

**Correspondence to:** Y. Eugene Yu, **email:** yuejin.yu@roswellpark.org

**Keywords:** Down syndrome; myeloproliferative disorder; genetically engineered mouse models; megakaryocyte-erythrocyte progenitors; granulocyte-monocyte progenitors

**Received:** August 21, 2017

**Accepted:** November 20, 2017

**Published:** December 19, 2017

**Copyright:** Liu et al. This is an open-access article distributed under the terms of the Creative Commons Attribution License 3.0 (CC BY 3.0), which permits unrestricted use, distribution, and reproduction in any medium, provided the original author and source are credited.

## ABSTRACT

Individuals with Down syndrome (DS) frequently have hematopoietic abnormalities, including transient myeloproliferative disorder and acute megakaryoblastic leukemia which are often accompanied by acquired GATA1 mutations that produce a truncated protein, GATA1s. The mouse has been used for modeling DS based on the syntenic conservation between human chromosome 21 (Hsa21) and three regions in the mouse genome located on mouse chromosome 10 (Mmu10), Mmu16 and Mmu17. To assess the impact of the dosage increase of Hsa21 gene orthologs on the hematopoietic system, we characterized the related phenotype in the *Dp(10)1Yey/+;Dp(16)1Yey/+;Dp(17)1Yey/+* model which carries duplications spanning the entire Hsa21 orthologous regions on Mmu10, Mmu16 and Mmu17, and the *Dp(10)1Yey/+;Dp(16)1Yey/+;Dp(17)1Yey/+;Gata1<sup>Yeym2</sup>* model which carries a *Gata1s* mutation we engineered. Both models exhibited anemia, macrocytosis, and myeloproliferative disorder. Similar to human DS, the megakaryocyte-erythrocyte progenitors (MEPs) and granulocyte-monocyte progenitors (GMPs) were significantly increased and reduced, respectively, in both models. The subsequent identification of all the aforementioned phenotypes in the *Dp(16)1Yey/+* model suggests that the causative dosage sensitive gene(s) are in the Hsa21 orthologous region on Mmu16. Therefore, we reveal here for the first time that the human trisomy 21-associated major segmental chromosomal alterations in mice can lead to expanded MEP and reduced GMP populations, mimicking the dynamics of these myeloid progenitors in DS. These models will provide the critical systems for unraveling the molecular and cellular mechanism of DS-associated myeloproliferative disorder, and particularly for

## determining how human trisomy 21 leads to expansion of MEPs as well as how such an alteration leads to myeloproliferative disorder.

### INTRODUCTION

Human trisomy 21, the most common human aneuploidy compatible with postnatal survival, occurs in approximately one out of 700–1000 live births [1, 2]. This chromosomal anomaly causes a constellation of developmental abnormalities, classified as Down syndrome (DS). The major clinical manifestations of DS include cardiovascular malformations, craniofacial abnormalities, developmental cognitive deficits, hematopoietic abnormalities, and Alzheimer-type neurodegeneration with variable penetrance and onset [3, 4].

Among hematopoietic abnormalities, transient myeloproliferative disorder (TMD) occurs in a substantial percentage of children with DS, and many of these patients later develop acute megakaryoblastic leukemia (AMKL) [5]. It has been demonstrated that children with DS who develop TMD and AMKL have acquired somatic mutations in exon 2 of the *GATA1* gene on the X chromosome, which lead to the generation of a mutant protein, GATA1s [6, 7]. The *GATA1*s germline mutation is associated with impaired erythropoiesis [8, 9].

To unravel the mechanism underlying development of myeloproliferative disorder in DS, genetic models with phenotypes mimicking DS at the molecular, cellular and organ levels are necessary. The mouse has been the most important model organism for DS due to evolutionary conservation between the human and mouse genomes. Regions on human chromosome 21 (Hsa21) are syntenically conserved with regions on mouse chromosome 10 (Mmu10), Mmu16 and Mmu17, which contain 41, 115, and 19 Hsa21 gene orthologs, respectively (Figure 1). DS is a contiguous gene syndrome [10] and evidence indicates that, for many DS phenotypes, more than one triplicated gene contributes through direct actions and/or interactions of the triplicated genes [11–17]. Therefore, in a mouse model, triplication of more Hsa21 gene orthologs increases the probability that all the direct actions and/or interactions that have a significant effect on a specific DS phenotype are mimicked.

Myeloproliferative disorder has been observed in several mouse models of DS [18–21]. Among them, Ts65Dn is the first viable trisomic mouse model of DS. This mutant carries Ts(17<sup>16</sup>)65Dn, an unbalanced derivative of a balanced chromosomal translocation, which was randomly induced by irradiation at Muriel Davisson's laboratory [22, 23]. Tc1 is another important mouse model of DS, developed by introducing Hsa21 into mouse embryonic stem (ES) cells using microcell-mediated chromosome transfer [24–27]. The hematopoietic phenotype has been extensively characterized in the Ts65Dn and Tc1 mouse models [18, 19]. However, a substantial number of Hsa21 gene orthologs are not

triplicated in either model. To include those missed Hsa21 orthologs, we have generated *Dp(10)1Yey/+* [i.e. *Dp(10)1*], *Dp(16)1Yey/+* [i.e. *Dp(16)1*], and *Dp(17)1Yey/+* [i.e. *Dp(17)1*] mice, by chromosome engineering which carry duplications spanning the entire Hsa21 orthologous regions on Mmu10, Mmu16, and Mmu17, respectively; thus all the DS-associated gene dosage alterations are mimicked (Figure 1) [15, 28]. We have shown that *Dp(10)1;Dp(16)1;Dp(17)1* and *Dp(16)1* mice exhibited DS-related heart defects, cognitive behavioral deficits, and impaired hippocampal long-term potentiation [15]. Extensive studies are also being performed on these mutant mice by many other laboratories [10, 29–38]. In this study, we extended the exploration of the impact of these engineered gene dosage alterations to DS-related hematopoiesis.

### RESULTS

#### Generation of *Gata1*<sup>Yeym2</sup> mice to delete exon 2 of the *Gata1* gene

To assess the effect of GATA1s in DS-associated hematopoietic abnormalities, we used gene targeting to delete exon 2 of the *Gata1* gene in mouse ES cells. First, we generated ES cell lines that carried the *Gata1*<sup>Yeym1</sup> mutant allele using the replacement vector pTVGata1. Recombination between pTVGata1 and the *Gata1* locus in ES cells led to the replacement of a genomic region containing exon 2 of the gene with a neomycin-resistance gene cassette flanked by two *loxP* sites (Figure 2A). We then expressed the Cre recombinase transiently in two *Gata1*<sup>Yeym1</sup> ES cell clones and the neomycin-resistance gene cassette was removed by Cre/*loxP*-mediated recombination. The excised allele was designated as *Gata1*<sup>Yeym2</sup> (Figure 2A). Germline transmission was established for four ES cell lines that carried *Gata1*<sup>Yeym2</sup>. Southern blot analysis was performed to confirm the deletion of the exon 2 region (Figure 2B). Expression of the mutant allele in the *Gata1*<sup>Yeym2</sup> mice was confirmed by RT-PCR (Figure 2C).

#### Triplications of all Hsa21 orthologous regions in mice result in peripheral blood abnormalities

*Dp(10)1;Dp(16)1;Dp(17)1* and *Dp(10)1;Dp(16)1;Dp(17)1;Gata1*<sup>Yeym2</sup> mice were generated as described in Materials and Methods. Peripheral complete blood counts (CBCs) of *Dp(10)1;Dp(16)1;Dp(17)1* mice, *Dp(10)1;Dp(16)1;Dp(17)1;Gata1*<sup>Yeym2</sup> mice and their wild-type controls were measured every 3 months until 15 months of age.

CBCs revealed reduced counts of red blood cells (RBCs) starting at 3 months of age ( $p < 0.001$ ) and lowered

hemoglobin concentrations (HGB) starting at 9 months of age ( $p < 0.05$ ) in both *Dp(10)1;Dp(16)1;Dp(17)1* mice and *Dp(10)1;Dp(16)1;Dp(17)1;Gatal<sup>Yeym2</sup>* mice (Figure 3A–3B), which indicated that both mutants developed anemia. *Dp(10)1;Dp(16)1;Dp(17)1;Gatal<sup>Yeym2</sup>* mice showed much lower RBC counts ( $p < 0.01$ ) and HGB concentrations ( $p < 0.01$ ) than *Dp(10)1;Dp(16)1;Dp(17)1* mice (Figure 3A–3B), suggesting that the *Gatal*s mutation causes more severe anemia by further reducing the RBC counts and HGB concentrations.

CBCs also showed increased mean corpuscular volume (MCV) ( $p < 0.0001$ ) and mean corpuscular hemoglobin (MCH) ( $p < 0.0001$ ) in both *Dp(10)1;Dp(16)1;Dp(17)1* mice and *Dp(10)1;Dp(16)1;Dp(17)1;Gatal<sup>Yeym2</sup>* mice starting at 3 months of age (Figure 3C–3D), indicating that both mutants developed macrocytosis. However, MCV and MCH were similar in *Dp(10)1;Dp(16)1;Dp(17)1* mice and *Dp(10)1;Dp(16)1;*

*Dp(17)1;Gatal<sup>Yeym2</sup>* mice (Figure 3C–3D), indicating that the *Gatal*s mutation did not contribute to increases in the volume of red blood cells.

In addition, platelet counts were elevated in both *Dp(10)1;Dp(16)1;Dp(17)1* mice and *Dp(10)1;Dp(16)1;Dp(17)1;Gatal<sup>Yeym2</sup>* mice starting at 6 months of age ( $p < 0.05$ ), indicating thrombocytosis. There was no significant difference in the magnitude of the thrombocytosis between the mutants (Figure 3E), suggesting that the *Gatal*s mutation did not significantly alter the severity of this phenotype.

Mean platelet volume was significantly increased in *Dp(10)1;Dp(16)1;Dp(17)1;Gatal<sup>Yeym2</sup>* mice starting at 3 months of age ( $p < 0.001$ ), but not in *Dp(10)1;Dp(16)1;Dp(17)1* mice (Figure 3F). This result suggests that the *Gatal*s mutation, but not the triplications of the Hsa21 orthologous regions, underlies the expanded platelet volume.

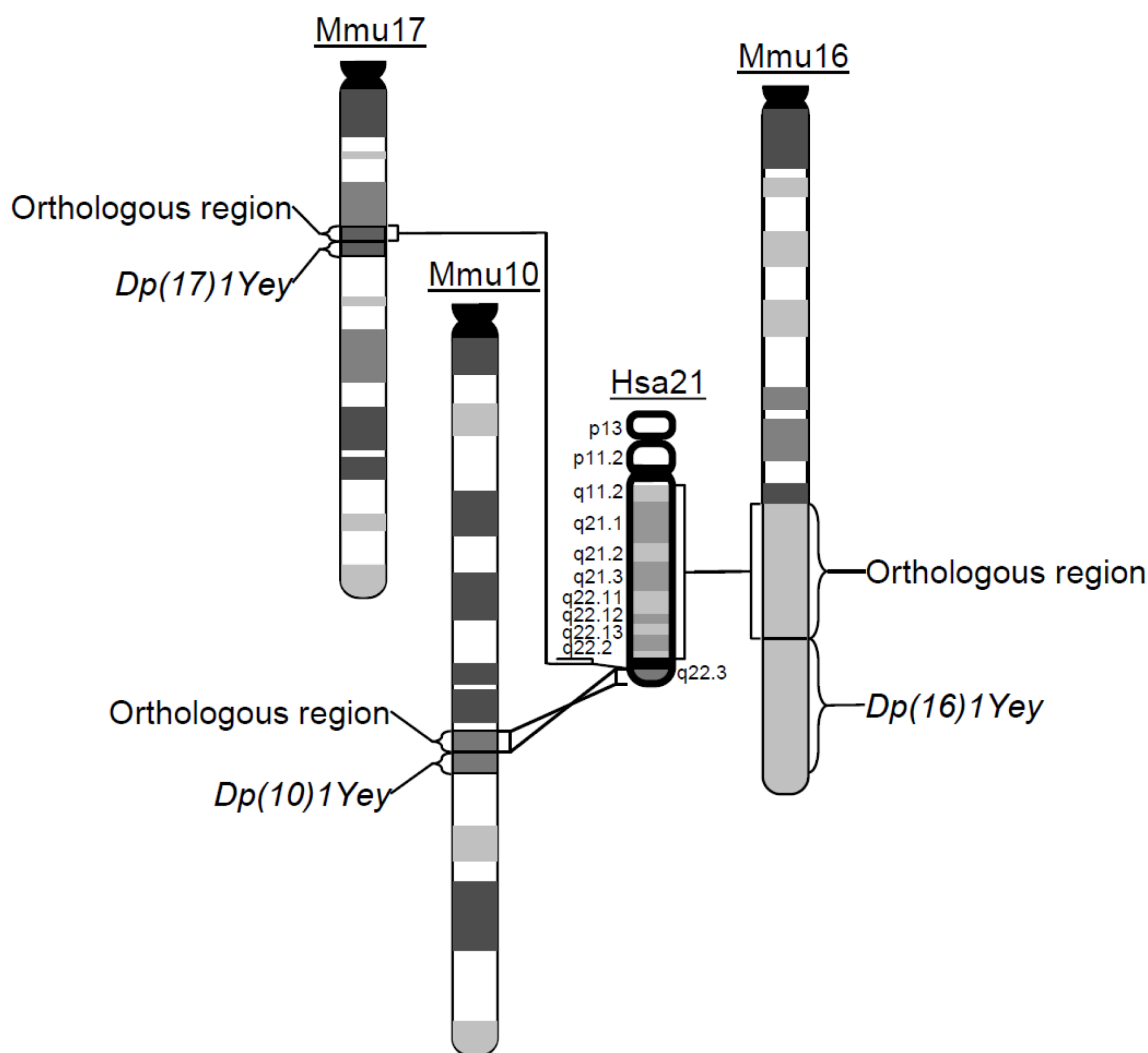

**Figure 1: The schematic representation of the chromosomal alterations in *Dp(10)1;Dp(16)1;Dp(17)1* mice.** Generated using Cre/*loxP*-mediated chromosome engineering, *Dp(10)1;Dp(16)1;Dp(17)1* mice contain three duplications spanning the entire Hsa21 orthologous regions on Mmu10, Mmu16 and Mmu17, respectively.

## Tripletuplications of all Hsa21 orthologous regions in mice result in abnormalities in spleen and bone marrow

To investigate the hematopoietic features of *Dp(10)1;Dp(16)1;Dp(17)1* and *Dp(10)1;Dp(16)1;Dp(17)1;Gata1<sup>Yeym2</sup>* mice, 15 to 24 month-old mutant mice and the wild-type littermates were euthanized and their spleens and bone marrows were harvested for histology and flow cytometry analysis. The average weights of the spleens, after normalization to body weight, accounted for  $0.91 \pm 0.16\%$ ,  $1.18 \pm 0.32\%$  and  $0.32 \pm 0.08\%$  of the total body weights in *Dp(10)1;Dp(16)1;Dp(17)1*, *Dp(10)1;Dp(16)1;Dp(17)1;Gata1<sup>Yeym2</sup>* and the wild-type control mice, respectively (Figure 4). These data indicate that both mutants exhibit splenomegaly ( $p < 0.01$ ) but there is no significant difference between the weights of the spleens isolated from the two mutants ( $p > 0.05$ ).

Histological sections showed disruption of red and white pulp architecture in the spleens from *Dp(10)1;Dp(16)1;Dp(17)1* mice and *Dp(10)1;Dp(16)1;Dp(17)1;Gata1<sup>Yeym2</sup>* mice (Figure 5). The structural distortions of the spleens are apparently due to severe megakaryocyte infiltration (Figure 6). The bone marrows of both *Dp(10)1;Dp(16)1;Dp(17)1* mice and *Dp(10)1;Dp(16)1;Dp(17)1;Gata1<sup>Yeym2</sup>* mice were also infiltrated with large numbers of megakaryocytes (Figure 6).

To further characterize the cells from bone marrow and spleen of the mouse mutants, we performed flow

cytometric analysis. Consistent with the histological analysis, our flow cytometric data indicate an increase of cells from CD41<sup>+</sup> megakaryocyte lineage in bone marrow and spleen of both *Dp(10)1;Dp(16)1;Dp(17)1* and *Dp(10)1;Dp(16)1;Dp(17)1;Gata1<sup>Yeym2</sup>* mice (Figure 7A). These data support the conclusion that both *Dp(10)1;Dp(16)1;Dp(17)1* and *Dp(10)1;Dp(16)1;Dp(17)1;Gata1<sup>Yeym2</sup>* mice developed megakaryocytosis. There is no significant difference in the percentages of CD41<sup>+</sup> megakaryocyte lineage cells between *Dp(10)1;Dp(16)1;Dp(17)1* and *Dp(10)1;Dp(16)1;Dp(17)1;Gata1<sup>Yeym2</sup>* mice (Figure 7A). In addition, Ter119<sup>+</sup> erythrocyte lineage cells were reduced in the bone marrows of both *Dp(10)1;Dp(16)1;Dp(17)1* mice and *Dp(10)1;Dp(16)1;Dp(17)1;Gata1<sup>Yeym2</sup>* mice (Figure 7B). Ter119<sup>+</sup> erythrocyte lineage cells were increased in the spleens of both *Dp(10)1;Dp(16)1;Dp(17)1* mice and *Dp(10)1;Dp(16)1;Dp(17)1;Gata1<sup>Yeym2</sup>* mice, and such increases are likely associated with splenomegaly.

## Tripletuplications of all Hsa21 orthologous regions in mice result in perturbations of hematopoietic stem cells as well as expansion of megakaryocyte-erythroid progenitors and reduction of granulocyte-macrophage progenitors

To further determine whether the abnormalities in the peripheral blood, spleen and bone marrow were associated with the changes in hematopoietic stem cells or progenitor populations in bone marrow, flow

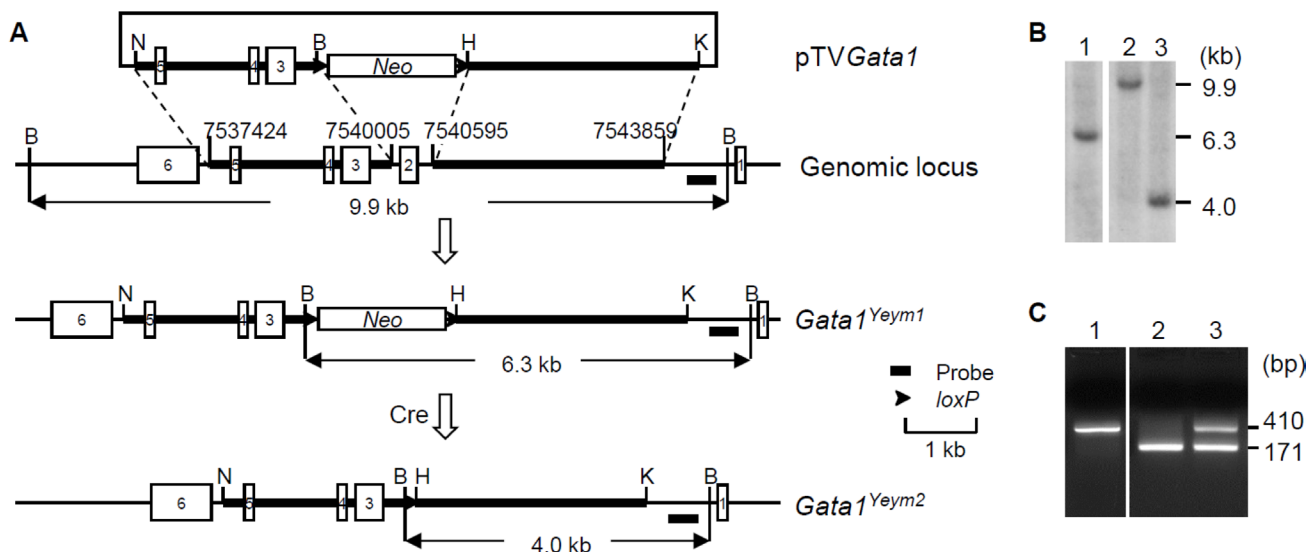

**Figure 2: Development of *Gata1<sup>Yeym2</sup>* mutant mouse strain.** (A) Targeting strategy for generating the *Gata1<sup>Yeym2</sup>* allele. *Neo*, neomycin-resistance gene cassette. B, *Bam*HI; H, *Hind*III; K, *Kpn*I; N, *Not*I. The genome coordinates of the homology arms were marked. (B) Southern blot analysis of *Bam*HI-digested ES cell DNA. Lane 1, An ES cell clone containing the *Gata1<sup>Yeym1</sup>* allele; lane 2, the wild-type ES cells; lane 3, the ES cell clone containing the *Gata1<sup>Yeym2</sup>* allele. (C) RT-PCR analysis of total RNA isolated from the fetal livers of E14.5 embryos, showing the PCR products from the cDNA of wild type *Gata1* and *Gata1<sup>Yeym2</sup>*. MW, molecular-weight size marker, TrackIt™ 50 bp DNA Ladder (Invitrogen); lane 1, a wild-type embryo; lane 2, a male *Gata1<sup>Yeym2</sup>* embryo; lane 3, a heterozygous female *Gata1<sup>Yeym2</sup>* embryo.

cytometry was performed to examine the lineage- $^+$ Scal $^+$ c-Kit $^+$  (LSK) hematopoietic stem cells and myeloid progenitors in the bone marrow of 15-month-old *Dp(10)1;Dp(16)1;Dp(17)1* mice, *Dp(10)1;Dp(16)1;Dp(17)1;Gata1<sup>Yeym2</sup>* mice, and wild-type controls. Our results showed that the LSK stem cells were expanded in both *Dp(10)1;Dp(16)1;Dp(17)1* mice and *Dp(10)1;Dp(16)1;Dp(17)1;Gata1<sup>Yeym2</sup>* mice compared to the wild-type controls (Figure 8A). In myeloid progenitor compartments, the common myeloid progenitors (CMPs) (lineage $^-$ , Scal $^-$ , c-Kit $^+$ , CD34 $^+$ , FcγR $^-$ ) remained unchanged, while the megakaryocyte-erythrocyte progenitors (MEPs) (lineage $^-$ , Scal $^-$ , c-Kit $^+$ , CD34 $^-$ , FcγR $^-$ ) and the granulocyte-monocyte progenitors (GMPs) (lineage $^-$ , Scal $^-$ , c-Kit $^+$ , CD34 $^+$ , FcγR $^+$ ) were increased and decreased, respectively, in both *Dp(10)1;Dp(16)1;Dp(17)1* mice and *Dp(10)1;Dp(16)1;Dp(17)1;Gata1<sup>Yeym2</sup>* mice when compared to the wild-type controls (Figure 8B). There were no significant differences in the LSK stem cells, MEPs, GMPs and CMPs between *Dp(10)1;Dp(16)1;Dp(17)1* mice and *Dp(10)1;Dp(16)1;Dp(17)1;Gata1<sup>Yeym2</sup>* mice (Figure 8).

### Triplification of the Hsa21 orthologous region on Mmu16 results in expansion of MEPs and reduction of GMPs

In contrast to *Dp(10)1;Dp(16)1;Dp(17)1* mice, Ts65Dn mice have repeatedly shown reduction of MEPs and expansion of GMPs [19, 39]. Ts65Dn and *Dp(16)1* carry 3 copies of the identical set of 100 Hsa21 gene orthologs on Mmu16, so we speculated that *Dp(16)1* mice would likely also show reduction of MEPs and expansion of GMPs. We further speculated that expansion of MEPs and reduction of GMPs in *Dp(10)1;Dp(16)1;Dp(17)1* mice may be caused by *Dp(10)1* and/or *Dp(17)1*. To test these possibilities, we carried out phenotypic analysis of *Dp(16)1* mice. To our surprise, the hematopoietic phenotypes of *Dp(16)1* mice are almost identical to those of *Dp(10)1;Dp(16)1;Dp(17)1* mice, including expansion of MEPs and reduction of GMPs (Figure 9 and Supplementary Figures 1–4). These results suggest that the causative gene(s) responsible for expansion of MEPs and reduction of GMPs are located in the Hsa21 orthologous region on Mmu16. These results also suggest

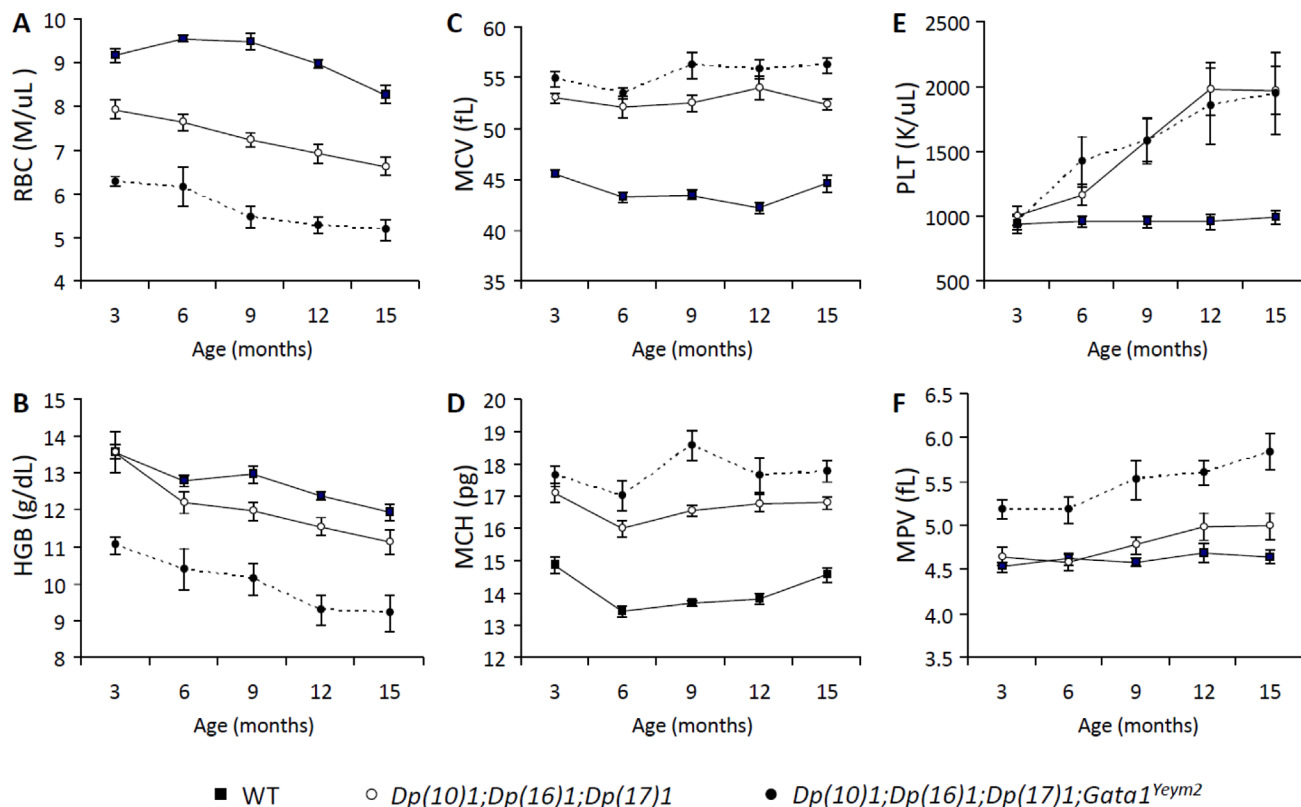

**Figure 3: Complete blood counts (CBC) of *Dp(10)1;Dp(16)1;Dp(17)1*, *Dp(10)1;Dp(16)1;Dp(17)1;Gata1<sup>Yeym2</sup>* mice and wild-type controls.** (A) Red blood cells (RBC) (M/μL; millions per microliter); (B) Hemoglobin (HGB) (g/dL, grams per deciliter); (C) Mean corpuscular volume (MCV) (fL, femtoliters); (D) Mean corpuscular hemoglobin (MCH) (pg, picograms); (E) Platelets (PLT) (K/μL; thousands per microliter); (F) Mean platelet volume (MPV). Closed square, the wild-type controls ( $n = 14, 14, 9, 15, 21$  at 3, 6, 9, 12, 15 months of age, respectively); open circle, *Dp(10)1;Dp(16)1;Dp(17)1* mice ( $n = 6, 13, 9, 14, 14$  at 3, 6, 9, 12, 15 months of age, respectively); closed circle, *Dp(10)1;Dp(16)1;Dp(17)1;Gata1<sup>Yeym2</sup>* mice ( $n = 8, 5, 5, 6, 5$  at 3, 6, 9, 12, 15 months of age, respectively).

that triplicated genes which differ between *Dp(16)1* and Ts65Dn mice are responsible for diametrically opposite effect on MEPs and GMPs.

## DISCUSSION

In this study, we analyzed the hematopoietic phenotype of the *Dp(10)1;Dp(16)1;Dp(17)1* mouse model of DS, which contains duplications spanning the entire Hsa21 orthologous regions on Mmu10, Mmu16, and Mmu17 [15, 28]. These mice exhibited anemia, macrocytosis, thrombocytosis, megakaryocytosis, splenomegaly, and perturbed hematopoietic stem cells and progenitor cell compartments including expanded MEP and reduced GMP populations (Figure 10). The subsequent analysis of *Dp(16)1* mice indicated that these phenotypes are the consequences of the triplication of Hsa21 gene orthologs on Mmu16.

Hematopoietic phenotypes have been characterized in two other major mouse models of DS, Ts65Dn and Tc1 [18, 19]. Ts65Dn mice carry a triplication of a genomic

fragment of approximately 13.5 Mb extending from miR-155 to the telomere on Mmu16 and encompassing 100 Hsa21 gene orthologs, which accounts for approximately 57% of the Hsa21 gene orthologs (Figure 10) [22, 40, 41]. Ts65Dn mice also carry a triplicated genomic fragment of approximately 10 Mb extending from the centromere to *1700010114Rik* on Mmu17 which contains 36 Hsa6 gene orthologs [40, 41]. Ts65Dn mice, *Dp(10)1;Dp(16)1;Dp(17)1* mice and *Dp(16)1* mice share some major features of the hematopoietic phenotype, such as anemia, macrocytosis and myeloproliferative disease characterized by thrombocytosis, megakaryocytic hyperplasia and a distorted hematopoietic stem cell compartment [19]. However, these three models also exhibit important differences in the hematopoietic features. Compared with the wild-type controls, the percentages of MEPs and GMPs in the myeloid progenitor compartments are increased and decreased, respectively, in both *Dp(10)1;Dp(16)1;Dp(17)1* and *Dp(16)1* mice (Figures 8B, 9B). In contrast, the percentages of MEPs and GMPs are decreased and increased, respectively, in

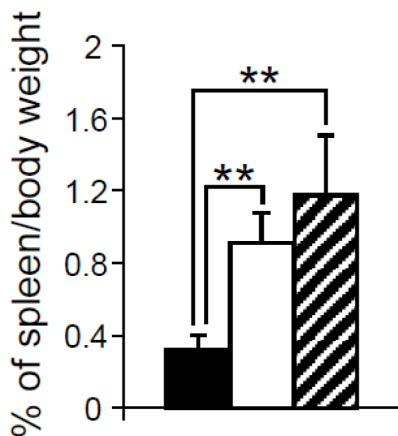

**Figure 4: Relative weights of the spleens from mice with different genotypes.** The percentage of spleen weight over body weight in the wild-type controls ( $n = 6$ , solid bar); *Dp(10)1;Dp(16)1;Dp(17)1* mice ( $n = 6$ , open bar) and *Dp(10)1;Dp(16)1;Dp(17)1;Gata1<sup>Yeym2</sup>* mice ( $n = 5$ , diagonal-lined bar). \*\* $p < 0.01$ .

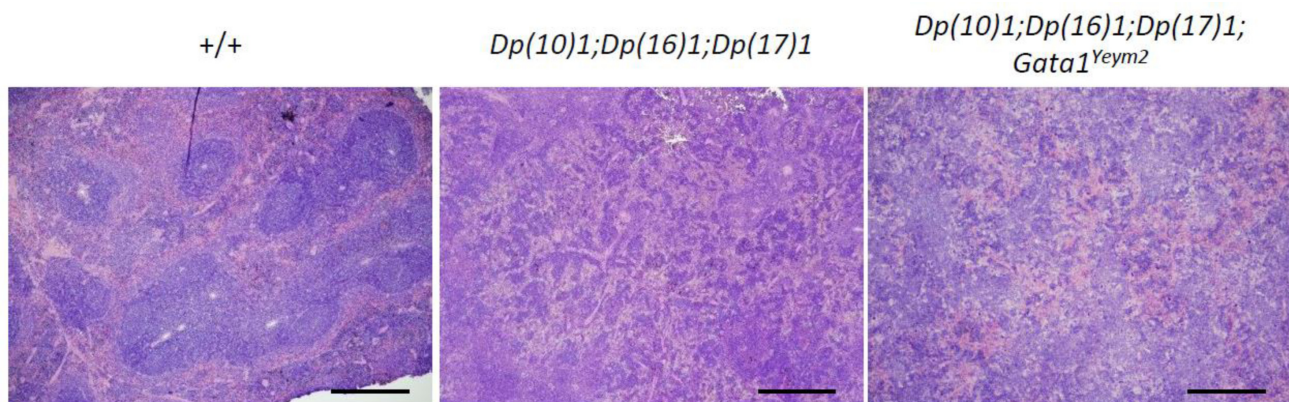

**Figure 5: Histological sections of the spleens from different genotypes at lower magnification.** The spleen structure of wild-type controls, *Dp(10)1;Dp(16)1;Dp(17)1* mice and *Dp(10)1;Dp(16)1;Dp(17)1;Gata1<sup>Yeym2</sup>* mice under hematoxylin and eosin staining. Scale bar, 40  $\mu$ m.

Ts65Dn mice (Figure 10) [19]. Because MEPs are the progenitors of megakaryocytes, this specific observation in *Dp(10)1;Dp(16)1;Dp(17)1* and *Dp(16)1* mice may better reflect the abnormal hematopoiesis underlying DS-associated myeloproliferative disorder. Such reasoning is also supported by the observation that the percentages of MEPs and GMPs are increased and decreased, respectively, in the livers of fetuses carrying human trisomy 21 [42–44]. Tc1 mice carry a Hsa21 with three major deletions and other genomic alterations, including duplications and gene mutations, which are likely caused by irradiation of Hsa21

during microcell-mediated chromosome transfer [26, 45]. The random loss of the transferred human chromosome during mouse development resulted in variable levels of mosaicism of the extra chromosome in different tissues [26]. Tc1 mice, *Dp(10)1;Dp(16)1;Dp(17)1* and *Dp(16)1* mice share some important features of the hematopoietic phenotype, such as anemia, macrocytosis, splenomegaly, and an increase in the numbers of megakaryocytes in the spleen [18]. However, unlike *Dp(10)1;Dp(16)1;Dp(17)1* and *Dp(16)1* mice, Tc1 mice did not exhibit significant abnormalities in hematopoietic stem cell and myeloid

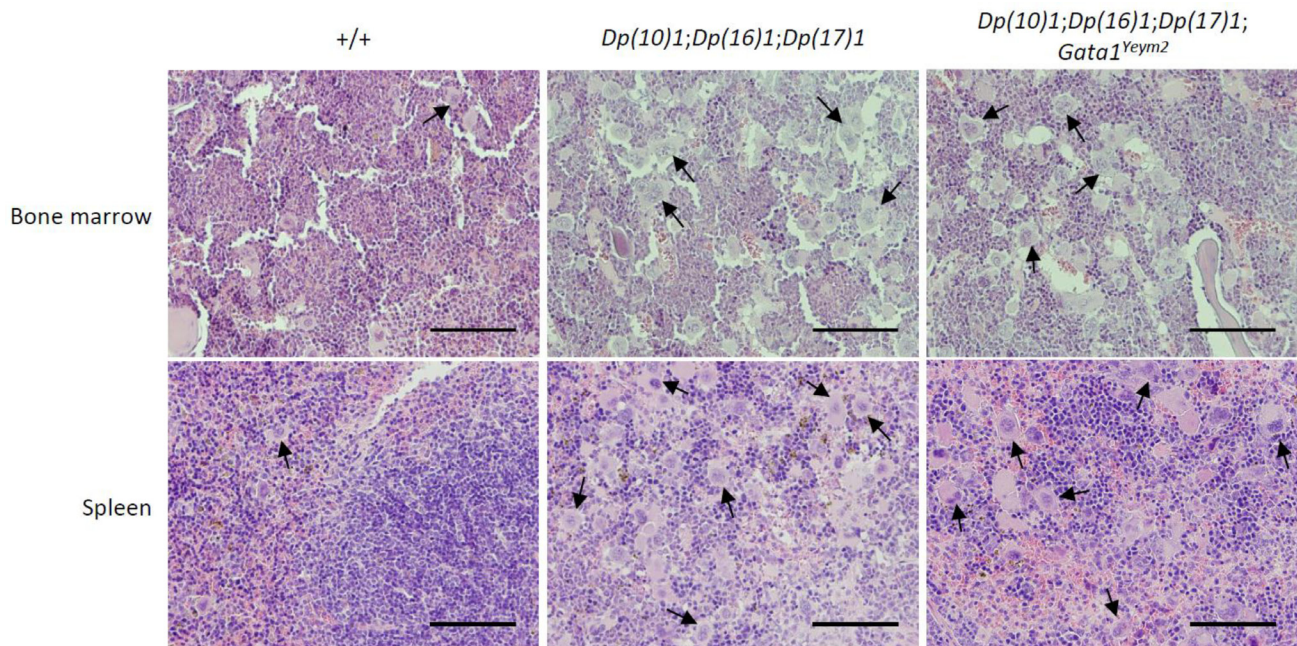

**Figure 6: Histological sections of the bone marrow and spleens from different genotypes at higher magnification.** Hematoxylin and eosin staining of bone marrow and spleen sections in wild-type controls, *Dp(10)1;Dp(16)1;Dp(17)1* mice and *Dp(10)1;Dp(16)1;Dp(17)1;Gata1<sup>Yeym2</sup>* mice. Scale bar, 10  $\mu$ m. Arrows point to the megakaryocytes in the sections.

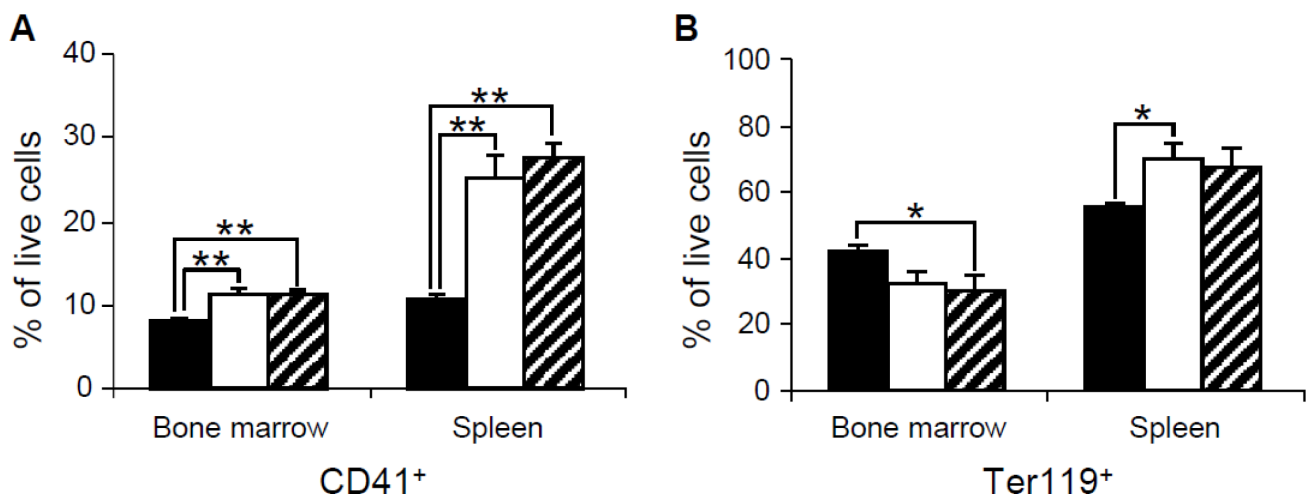

**Figure 7: Flow cytometric analysis of bone marrow and spleen cells in wild-type controls, *Dp(10)1;Dp(16)1;Dp(17)1* mice and *Dp(10)1;Dp(16)1;Dp(17)1;Gata1<sup>Yeym2</sup>* mice.** (A) CD41<sup>+</sup> megakaryocyte lineage cells; (B) Ter119<sup>+</sup> erythrocyte lineage cells. Solid bar, the wild-type controls ( $n = 6$ ); open bar, *Dp(10)1;Dp(16)1;Dp(17)1* mice ( $n = 6$ ) and diagonal-lined bar, *Dp(10)1;Dp(16)1;Dp(17)1;Gata1<sup>Yeym2</sup>* mice ( $n = 5$ ).  $p < 0.05$ ;  $p < 0.01$ .

progenitor compartments, such as MEPs and GMPs [18]. The differences in these phenotypic features could be caused by the Hsa21 genes deleted or mutated on the transchromosome, by transchromosome mosaicism, and/or by species-specific differences between the proteins encoded by human and mouse chromosomes. Therefore, *Dp(10)1;Dp(16)1;Dp(17)1* mice exhibit more important DS-patient-associated hematopoietic abnormalities than other major mouse models of DS carrying an additional copy of Hsa21 orthologous regions, particularly expansion of MEPs and reduction of GMPs. These mice will provide a more desirable system for a better understanding of disease processes and the underlying pathogenic mechanism.

It is a surprise that *Dp(16)1* and Ts65Dn exhibit opposing MEP and GMP phenotypes since they share the same 100 triplicated genes. However, there are additional triplicated genes which differ between the two models: *Dp(16)1* carries a triplication of 15 additional Hsa21 gene orthologs on Mmu16, while Ts65Dn carries a triplication of 36 additional Hsa6 gene orthologs on Mmu17. Therefore, these genetic differences may underlie the opposite phenotypes related to MEPs and GMPs.

MEPs are the myeloid progenitors of megakaryocytes, and therefore the expansion of MEPs observed in human DS and *Dp(10)1;Dp(16)1;Dp(17)1* and *Dp(16)1* mice could be a major logical cellular event leading to myeloproliferative disorder in humans and mouse models (Figure 10). However, Ts65Dn mice also exhibit myeloproliferative disorder (Figure 10) [19] despite exhibiting a reduction of MEPs. One possible reason for this is that differentiation of MEPs to megakaryoblasts may be further accelerated in Ts65Dn, which may then lead to a relative reduction in the number of MEPs. Regardless of the possible reasons, reduction

of MEPs detected in Ts65Dn mice deviates from the hematopoietic abnormality observed in human DS. Thus, unraveling why *Dp(16)1* and Ts65Dn are different in MEP- and GMP-related phenotypes may help to improve our understanding of the mechanism underlying myeloproliferative disorder in DS.

Expansion of MEPs and reduction of GMPs were also observed in compound transgenic mice which carry a human *ERG* transgene and a germline *Gata1s* mutation [46]. The *ERG* transgene was driven by regulatory elements from the mouse *vav* gene. There are several potential reasons why this compound mutant may not accurately model the related pathogenic process in human DS. First, the cell- and temporal-specific expression patterns of *vav* and *Erg* may be different, so the expression pattern of the *ERG* transgene may deviate from that of the endogenous *Erg*. Second, the levels of expression between the wild-type allele of *Erg* and the transgenic *ERG* may be also different. A more desirable approach to assess the contribution of an individual Hsa21 gene ortholog to a phenotype is to use a “subtractive strategy”, which involves normalizing the dosage of a Hsa21 gene ortholog by compounding its nonfunctional allele in a segmental chromosomal alteration mouse model of DS. When this strategy was applied to *Erg* in Ts65Dn mice, reducing *Erg* from 3 copies to 2 copies actually led to a significant expansion of MEPs [39], which indicates that the increased *Erg* copy number in Ts65Dn mice is responsible for the reduction of MEPs. This result suggests the *ERG/Gata1s* transgenic mice described above may not be appropriate to model the MEP expansion in human DS.

In normal human hematopoietic cells, both full length GATA1 and GATA1s protein are expressed [47]. Germline and somatic mutations have been detected in

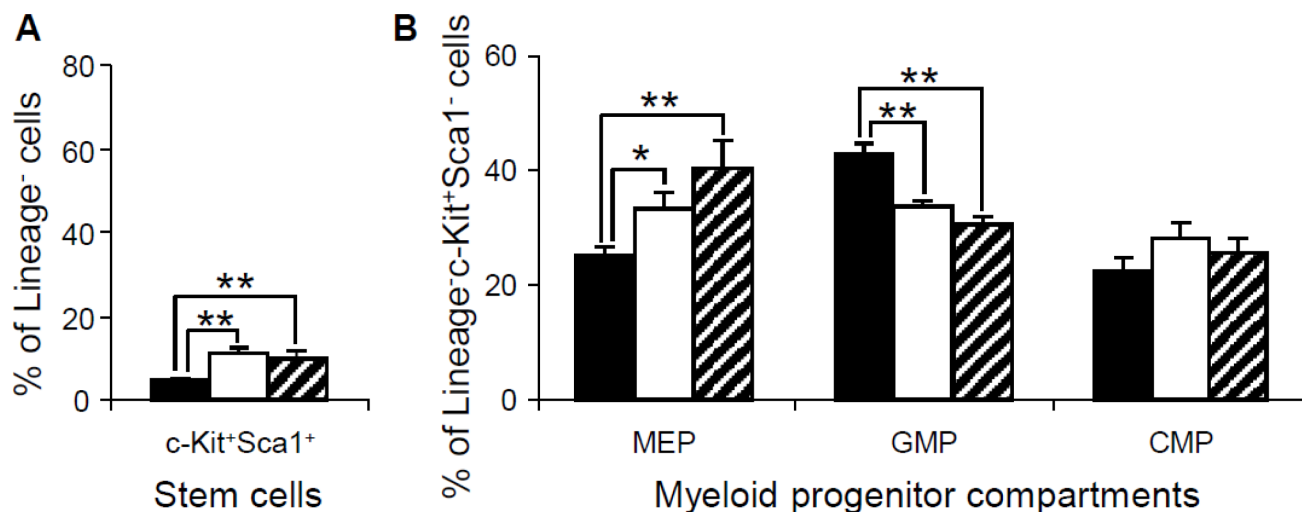

**Figure 8: Flow cytometric analysis of the stem cells and myeloid progenitor compartments in bone marrow of wild-type controls, *Dp(10)1;Dp(16)1;Dp(17)1* mice and *Dp(10)1;Dp(16)1;Dp(17)1;Gata1<sup>Yeym2</sup>* mice. (A) Stem cells (lineage<sup>-</sup>, Sca1<sup>+</sup>, c-Kit<sup>+</sup>) (LSK); (B) Myeloid progenitor compartments: MEPs (lineage<sup>-</sup>, Sca1<sup>-</sup>, c-Kit<sup>+</sup>, CD34<sup>+</sup>, FcγR<sup>-</sup>), GMPs (lineage<sup>-</sup>, Sca1<sup>-</sup>, c-Kit<sup>+</sup>, CD34<sup>+</sup>, FcγR<sup>+</sup>) and CMPs (lineage<sup>-</sup>, Sca1<sup>-</sup>, c-Kit<sup>+</sup>, CD34<sup>+</sup>, FcγR<sup>-</sup>). Solid bar, the wild-type controls ( $n = 6$ ); open bar, *Dp(10)1;Dp(16)1;Dp(17)1* mice ( $n = 6$ ) and diagonal-lined bar, *Dp(10)1;Dp(16)1;Dp(17)1;Gata1<sup>Yeym2</sup>* mice ( $n = 5$ ). \* $p < 0.05$ ; \*\* $p < 0.01$ .**

exon 2 of the *GATA1* gene, which resulted in expression of only the GATA1s protein without GATA1. The somatic mutations are associated with DS-TMD and AMKL in children with DS [6, 8, 48–51]. The human germline *GATA1s* mutation has been shown to cause anemia in males by affecting erythropoiesis [8]. This mutation-associated effect is also reflected in *Dp(10)1;Dp(16)1;Dp(17)1;Gatal<sup>Yeym2</sup>* mice, since they exhibited more severe anemia than *Dp(10)1;Dp(16)1;Dp(17)1* mice (Figures 3A, 3B). In humans, the germline *GATA1s* mutation affects the morphology of platelets but not their number in the peripheral blood [8]. The impact of the *Gatal1s* mutation on the platelets of our mouse models is reminiscent of that seen in humans; there is no significant difference in the number of platelets in the CBC between *Dp(10)1;Dp(16)1;Dp(17)1* and *Dp(10)1;Dp(16)1;Dp(17)1;Gatal<sup>Yeym2</sup>* mice, but the mean platelet volume is expanded in *Dp(10)1;Dp(16)1;Dp(17)1;Gatal<sup>Yeym2</sup>* mice when compared to *Dp(10)1;Dp(16)1;Dp(17)1* mice (Figures 3E, 3F).

In this study, we demonstrated expansion of MEPs and reduction of GMPs in major mouse models of DS with human trisomy 21-associated segmental genomic alterations for the first time, mirroring the corresponding changes of these myeloid progenitors in DS. Thus, further study of these models may lead to identification of the causative gene(s) for expansion of MEPs, which will be the key to a better understanding of the pathogenic mechanism of DS-associated myeloproliferative disorder. In particular, these models may provide further insight into how trisomy 21 leads to expansion of MEPs and how the quantitative alteration of MEPs contributes to the development of myeloproliferative disorder in DS.

## MATERIALS AND METHODS

### Generation of the *Gatal<sup>Yeym2</sup>* mutant mice

The mutant mouse strain was generated using gene-targeting in ES cell to delete exon 2 of the *Gatal* gene which resulted in the expression of a truncated mutant protein, GATA1s. The targeting vector, pTV*Gatal*, was constructed by inserting two homologous regions into a Bluescript KS plasmid that contained a *PGKneobpA* (*loxP*) cassette in the polylinker (a gift from Dr. Richard Behringer). The first homology region was amplified by primers N1033 (5'-TGCGGCCGCTGGCCCTGATCTCAGCTCAGAATA-3') and B3614 (5'-TGGATCCTACCGCCCCATTGTACCAATCCT-3') to produce a 2598-bp fragment in between intron 2 and intron 5. After cloning the first fragment into pCR-XL-TOPO® using TOPO®XL PCR Cloning Kit (Invitrogen), the homology arm was excised out by digesting with *NotI* and *BamHI*. The second homology region was amplified by primers H4204 (5'-TTAAGCTTCCACCACCGCCTGGCTCTTC-3') and K7468 (5'-TGGTACCAGTGCTGGGTTTAAAGGTGTGC-3') to produce a 3286-bp fragment inside the first intron. After cloning the second fragment into pCR-XL-TOPO®, the homologous arm was excised out by digesting with *HindIII* and *KpnI*. The excised fragments were then sequentially inserted between *NotI* and *BamHI* site as well as between *HindIII* and *KpnI* sites of the poylinkers on either side of the *PGKneobpA*(*loxP*) cassette. The resulting targeting vector, pTV*Gatal*, was linerized with *KpnI* and electroporated into AB2.2 ES cells. The targeted allele, *Gatal<sup>Yeym1</sup>*, was obtained by G418 selection as described previously [52, 53]. Cre/*loxP*-mediated marker

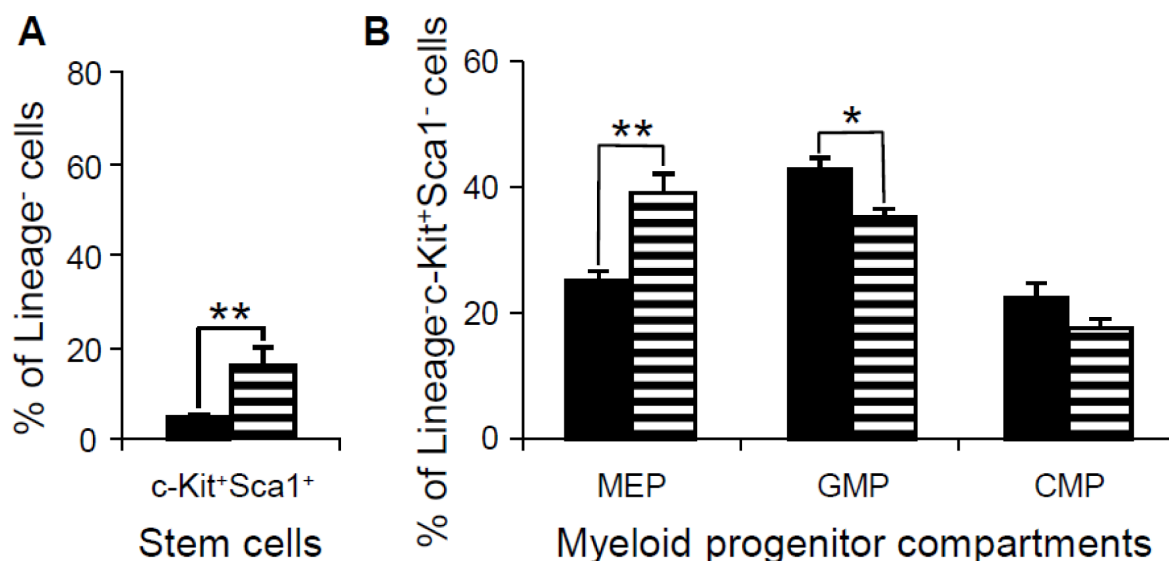

**Figure 9: Flow cytometric analysis of the stem cells and myeloid progenitor compartments in bone marrow of wild-type controls and *Dp(16)1* mice.** (A) Stem cells (lineage<sup>-</sup>, Sca1<sup>+</sup>, c-Kit<sup>+</sup>) (LSK); (B) Myeloid progenitor compartments: MEPs (lineage<sup>-</sup>, Sca1<sup>-</sup>, c-Kit<sup>+</sup>, CD34<sup>+</sup>, FcγR<sup>-</sup>), GMPs (lineage<sup>-</sup>, Sca1<sup>-</sup>, c-Kit<sup>+</sup>, CD34<sup>+</sup>, FcγR<sup>+</sup>) and CMPs (lineage<sup>-</sup>, Sca1<sup>-</sup>, c-Kit<sup>+</sup>, CD34<sup>+</sup>, FcγR<sup>-</sup>). Solid bar, the wild-type controls (*n* = 6); horizontal-lined bar, *Dp(16)1* mice (*n* = 5). \**p* < 0.05; \*\**p* < 0.01.

excision [54] was carried out and the final excised allele, *Gata1*<sup>Yeym2</sup>, was identified by Southern blot analysis with *Bam*HI digested DNA. The probe used in the Southern blot hybridization was amplified by primers Probe-U (5'-GGG GGACATTGGGACAGAATAGTT-3') and Probe-L (5'-AT TCCCCACGCTCCTATCTCAT-3'), which is mapped to the genomic region downstream of the homologous region in Intron 1 (Figure 2).

### Mice

*Gata1*<sup>Yeym2</sup> mice were first established in a 129SvEvxC57BL/6JF1 strain background and then backcrossed to C57BL/6J mice for five generations. *Dp(10)1*, *Dp(16)1*, and *Dp(17)1* mice were generated using recombinase-mediated genome engineering, which carry the duplications spanning the entire Hsa21 orthologous regions on Mmu10, Mmu16 and Mmu17, respectively [15, 28]. *Dp(10)1*, *Dp(16)1* and *Dp(17)1* mice

were backcrossed to C57BL/6J mice for five generations before being used to generate *Dp(10)1*;*Dp(16)1*;*Dp(17)1* mice. The latter was crossed to *Gata1*<sup>Yeym2</sup> mice to establish *Dp(10)1*;*Dp(16)1*;*Dp(17)1*;*Gata1*<sup>Yeym2</sup> mice. All mice were maintained at a temperature- and humidity-controlled animal facility. *Gata1* is located on X chromosome. To facilitate appropriate interpretation, we have used only male mice with different genotypes in all the experimental procedures of this study, so only single copy of the *Gata1* or *Gata1s* allele is present in all mice used in the procedures. All the experimental procedures performed were approved by the Institutional Animal Care and Use Committee at Roswell Park Cancer Institute.

### RT-PCR

Total RNA was extracted from the livers of E14.5 embryos using TRIzol Reagent and PureLink RNA Micro kit (Invitrogen Corp., Carlsbad, CA). One µg of

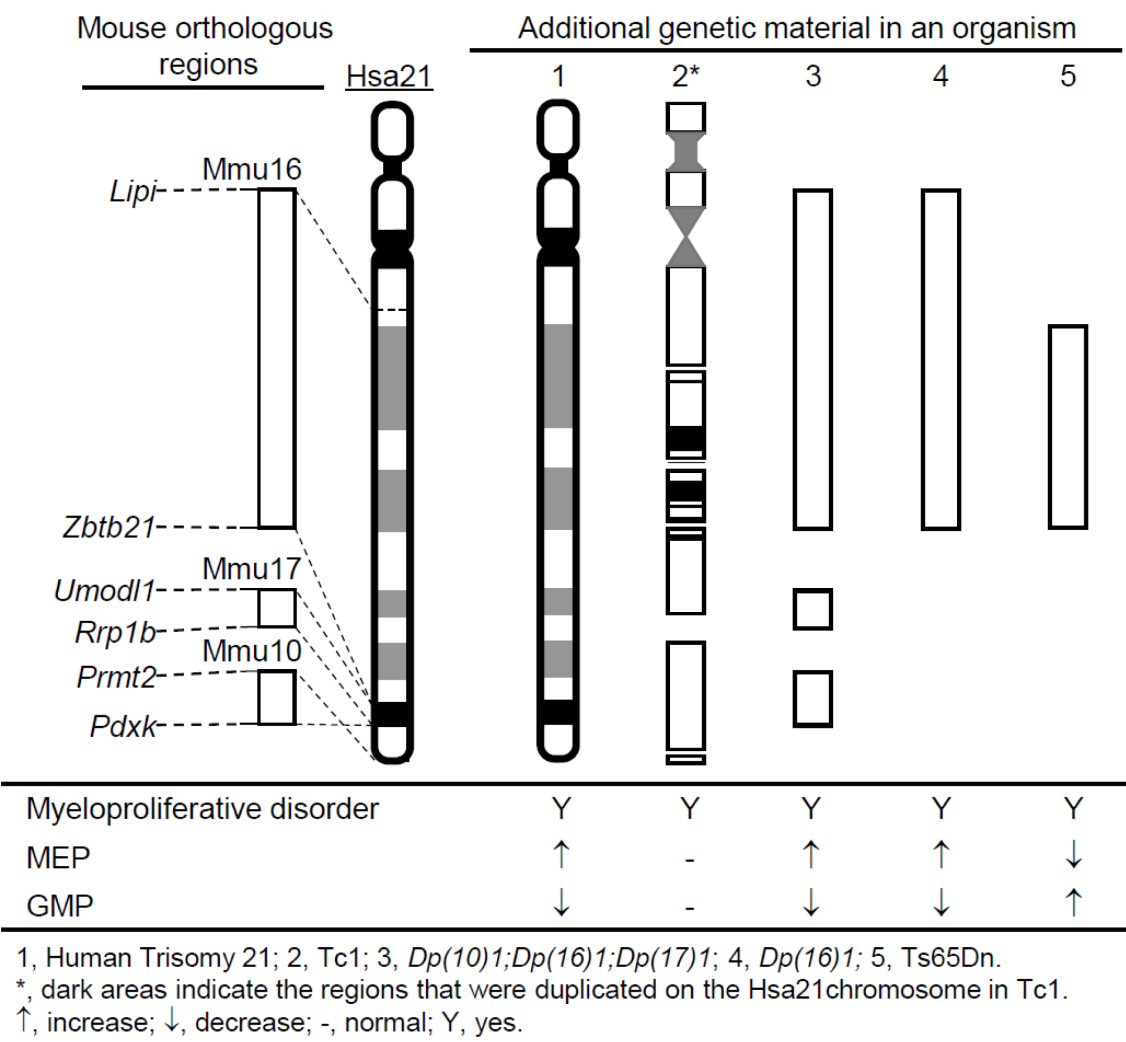

**Figure 10: The status of the myeloid progenitors in the major segmental chromosomal alteration mouse models of DS showing myeloproliferative disorder.**

the total RNA from each embryo was used to synthesize cDNA by Superscript version III reverse transcriptase (Invitrogen Corp., Carlsbad, CA). To detect the expression of *Gatal* and *Gatals*, cDNA was analyzed by PCR amplification with the primers GATA1SRTF1 (TCAGAGGCCAAGGCCAGTGAGGACT) and GATA1SRTR1 (TTGCCATAGGCCAGCTAGCATAAGG). The lengths of the PCR products are 410- and 171-bp, reflecting to the wild-type and the *Gatal*<sup>Yeym2</sup> alleles, respectively (Figure 2C).

### Complete blood counts

Blood samples (~100 µL) were collected from the retro-orbital sinus using heparinized capillary tubes (Fisher Scientific, Pittsburgh, PA) into Mutlivette 600 K3E vials (SARSTEDT AG & Co., Nümbrecht, Germany) and analyzed on a Hemavet 850 complete blood counter (Drew Scientific, Waterbury, CT).

### Histology

Bones from femur or sternum and spleen were fixed in 10% buffered formalin and were further processed by the Roswell Park Cancer Institute Pathology Core Facility. Bone marrow samples were decalcified prior to processing. Paraffin sections of spleen and bone marrow were stained with hematoxylin and eosin. Slides were photographed on an Olympus BX41 microscope with a DP70 camera and captured with DP Controller software version 1.2.1.108 (Olympus Optical Co., Japan).

### Flow cytometry

Single-cell suspensions from bone marrow or spleen were prepared by passing the tissues through 70 µm cell strainers (BD Pharmingen, San Diego, CA) and red blood cells were lysed in RBC lysis buffer (150 mM NH<sub>4</sub>Cl, 10 mM KHCO<sub>3</sub>, 0.1 mM EDTA). One million cells from each sample were then labeled with the following, anti-CD41-FITC (BD Pharmingen) or anti-TER119-APC-Cy7 (BD Pharmingen) for 30 minutes on ice. Labeled cells were washed in autoMACS Rinsing Solution (Miltenyi Biotec, Auburn, CA) with the addition of 0.5% BSA, fixed with 1% paraformaldehyde in PBS overnight and then analyzed on a LSRII cytometer (BD Biosciences, San Jose, CA). For analysis of Lineage-Sca1<sup>+</sup>-Kit<sup>+</sup> (LSK) cell and myeloid progenitor cells, ten million bone marrow cells were lineage depleted by using the Lineage Cell Depletion Kit (Miltenyi Biotec) according to the manufacturer's protocol with the addition of the anti-IL-7R-biotin antibody (BD Pharmingen). After magnetic separation of the lineage cells through the MACS MS column, the lineage negative cells were incubated with streptavidin-PE-Cy5.5 (eBioscience, San Diego, CA), anti-Sca1-PE-Cy7 (BD Pharmingen), anti-c-Kit-APC (BD Pharmingen), anti-FcγR-PE (BD

Pharmingen) and anti-CD34-FITC (BD Pharmingen) on ice for 30 minutes and analyzed on a LSRII cytometer after washing and fixation as described above.

### Statistical analysis

Statistical analysis was performed using Student *t*-test and the non-parametric Mann-Whitney *U*-test. The level of statistical significance was set at *p* = 0.05. Data are presented as Mean ± SEM.

### CONFLICTS OF INTEREST

None of the authors has any conflicts of interest.

### FUNDING

This study was supported in part by grants from Roswell Park Alliance Foundation, Louis Sklarow Memorial Fund, American Cancer Society, Association for Research of Childhood Cancer, the Children's Guild Foundation, the National Institutes of Health (R01HL91519, R01NS66072, R21GM114645, P30CA16056) and the National Natural Science Foundation of China (81370745).

### REFERENCES

1. Parker SE, Mai CT, Canfield MA, Rickard R, Wang Y, Meyer RE, Anderson P, Mason CA, Collins JS, Kirby RS, Correa A, and National Birth Defects Prevention Network. Birth Defects Res A Clin Mol Teratol. 2010; 88:1008–1016.
2. Khoshnood B, Greenlees R, Loane M, Dolk H, and EUROCAT Project Management Committee, and EUROCAT Working Group. Paper 2: EUROCAT public health indicators for congenital anomalies in Europe. Birth Defects Res A Clin Mol Teratol. 2011; 91:S16–22.
3. Epstein CJ. The consequences of chromosome imbalance: principles, mechanism and models. New York: Cambridge University Press. 1986:486.
4. Roizen NJ, Patterson D. Down's syndrome. Lancet. 2003; 361:1281–1289.
5. Athale UH, Razzouk BI, Raimondi SC, Tong X, Behm FG, Head DR, Srivastava DK, Rubnitz JE, Bowman L, Pui CH, Ribeiro RC. Biology and outcome of childhood acute megakaryoblastic leukemia: a single institution's experience. Blood. 2001; 97:3727–3732.
6. Wechsler J, Greene M, McDevitt MA, Anastasi J, Karp JE, Le Beau MM, Crispino JD. Acquired mutations in GATA1 in the megakaryoblastic leukemia of Down syndrome. Nat Genet. 2002; 32:148–152.
7. Yoshida K, Toki T, Okuno Y, Kanezaki R, Shiraishi Y, Sato-Otsubo A, Sanada M, Park MJ, Terui K, Suzuki H, Kon A, Nagata Y, Sato Y, et al. The landscape of somatic mutations

- in Down syndrome-related myeloid disorders. *Nat Genet.* 2013; 45:1293–1299.
8. Hollanda LM, Lima CS, Cunha AF, Albuquerque DM, Vassallo J, Ozelo MC, Joazeiro PP, Saad ST, Costa FF. An inherited mutation leading to production of only the short isoform of GATA-1 is associated with impaired erythropoiesis. *Nat Genet.* 2006; 38:807–812.
  9. Sankaran VG, Ghazvinian R, Do R, Thiru P, Vergilio JA, Beggs AH, Sieff CA, Orkin SH, Nathan DG, Lander ES, Gazda HT. Exome sequencing identifies GATA1 mutations resulting in Diamond-Blackfan anemia. *J Clin Invest.* 2012; 122:2439–2443.
  10. Gupta M, Dhanasekaran AR, Gardiner KJ. Mouse models of Down syndrome: gene content and consequences. *Mamm Genome.* 2016; 27:538–555.
  11. Ahn KJ, Jeong HK, Choi HS, Ryoo SR, Kim YJ, Goo JS, Choi SY, Han JS, Ha I, Song WJ. DYRK1A BAC transgenic mice show altered synaptic plasticity with learning and memory defects. *Neurobiol Dis.* 2006; 22:463–472.
  12. Jiang X, Liu C, Yu T, Zhang L, Meng K, Xing Z, Belichenko PV, Kleschevnikov AM, Pao A, Peresie J, Wie S, Mobley WC, Yu YE. Genetic dissection of the Down syndrome critical region. *Hum Mol Genet.* 2015; 24:6540–6551.
  13. Marechal D, Lopes Pereira P, Duchon A, Herault Y. Dosage of the Abcg1-U2af1 region modifies locomotor and cognitive deficits observed in the Tc1 mouse model of Down syndrome. *PLoS One.* 2015; 10:e0115302.
  14. Pereira PL, Magnol L, Sahun I, Brault V, Duchon A, Prandini P, Gruart A, Bizot JC, Chadeaux-Vekemans B, Deutsch S, Trovero F, Delgado-Garcia JM, Antonarakis SE, et al. A new mouse model for the trisomy of the Abcg1-U2af1 region reveals the complexity of the combinatorial genetic code of down syndrome. *Hum Mol Genet.* 2009; 18:4756–4769.
  15. Yu T, Li Z, Jia Z, Clapcote SJ, Liu C, Li S, Asrar S, Pao A, Chen R, Fan N, Carattini-Rivera S, Bechard AR, Spring S, et al. A mouse model of Down syndrome trisomic for all human chromosome 21 syntenic regions. *Hum Mol Genet.* 2010; 19:2780–2791.
  16. Zhang L, Meng K, Jiang X, Liu C, Pao A, Belichenko PV, Kleschevnikov AM, Josselyn S, Liang P, Ye P, Mobley WC, Yu YE. Human chromosome 21 orthologous region on mouse chromosome 17 is a major determinant of Down syndrome-related developmental cognitive deficits. *Hum Mol Genet.* 2014; 23:578–589.
  17. Lana-Elola E, Watson-Scales S, Slender A, Gibbins D, Martineau A, Douglas C, Mohun T, Fisher EM, Tybulewicz VL. Genetic dissection of Down syndrome-associated congenital heart defects using a new mouse mapping panel. *Elife.* 2016; 5:e11614.
  18. Alford KA, Slender A, Vanes L, Li Z, Fisher EM, Nizetic D, Orkin SH, Roberts I, Tybulewicz VL. Perturbed hematopoiesis in the Tc1 mouse model of Down syndrome. *Blood.* 2010; 115:2928–2937.
  19. Kirsammer G, Jilani S, Liu H, Davis E, Gurbuxani S, Le Beau MM, Crispino JD. Highly penetrant myeloproliferative disease in the Ts65Dn mouse model of Down syndrome. *Blood.* 2008; 111:767–775.
  20. Klusmann JH, Godinho FJ, Heitmann K, Maroz A, Koch ML, Reinhardt D, Orkin SH, Li Z. Developmental stage-specific interplay of GATA1 and IGF signaling in fetal megakaryopoiesis and leukemogenesis. *Genes Dev.* 2010; 24:1659–1672.
  21. Malinge S, Bliss-Moreau M, Kirsammer G, Diebold L, Chlon T, Gurbuxani S, Crispino JD. Increased dosage of the chromosome 21 ortholog Dyrk1a promotes megakaryoblastic leukemia in a murine model of Down syndrome. *J Clin Invest.* 2012; 122:948–962.
  22. Davisson MT, Schmidt C, Akeson EC. Segmental trisomy of murine chromosome 16: a new model system for studying Down syndrome. *Prog Clin Biol Res.* 1990; 360:263–280.
  23. Reeves RH, Irving NG, Moran TH, Wohn A, Kitt C, Sisodia SS, Schmidt C, Bronson RT, Davisson MT. A mouse model for Down syndrome exhibits learning and behaviour deficits. *Nat Genet.* 1995; 11:177–184.
  24. Hernandez D, Mee PJ, Martin JE, Tybulewicz VL, Fisher EM. Transchromosomal mouse embryonic stem cell lines and chimeric mice that contain freely segregating segments of human chromosome 21. *Hum Mol Genet.* 1999; 8:923–933.
  25. Inoue T, Shinohara T, Takehara S, Inoue J, Kamino H, Kugoh H, Oshimura M. Specific impairment of cardiogenesis in mouse ES cells containing a human chromosome 21. *Biochem Biophys Res Commun.* 2000; 273:219–224.
  26. O'Doherty A, Ruf S, Mulligan C, Hildreth V, Errington ML, Cooke S, Sesay A, Modino S, Vanes L, Hernandez D, Linehan JM, Sharpe PT, Brandner S, et al. An aneuploid mouse strain carrying human chromosome 21 with Down syndrome phenotypes. *Science.* 2005; 309:2033–2037.
  27. Shinohara T, Tomizuka K, Miyabara S, Takehara S, Kazuki Y, Inoue J, Katoh M, Nakane H, Iino A, Ohguma A, Ikegami S, Inokuchi K, Ishida I, et al. Mice containing a human chromosome 21 model behavioral impairment and cardiac anomalies of Down's syndrome. *Hum Mol Genet.* 2001; 10:1163–1175.
  28. Li Z, Yu T, Morishima M, Pao A, LaDuca J, Conroy J, Nowak N, Matsui S, Shiraishi I, Yu YE. Duplication of the entire 22.9-Mb human chromosome 21 syntenic region on mouse chromosome 16 causes cardiovascular and gastrointestinal abnormalities. *Hum Mol Genet.* 2007; 16:1359–1366.
  29. Belichenko PV, Kleschevnikov AM, Becker A, Wagner GE, Lysenko LV, Yu YE, Mobley WC. Down Syndrome Cognitive Phenotypes Modeled in Mice Trisomic for All HSA 21 Homologues. *PLoS One.* 2015; 10:e0134861.

30. Bhutta MF, Cheeseman MT, Herault Y, Yu YE, Brown SD. Surveying the Down syndrome mouse model resource identifies critical regions responsible for chronic otitis media. *Mamm Genome*. 2013; 24:439–445.
31. Souchet B, Guedj F, Sahun I, Duchon A, Daubigney F, Badel A, Yanagawa Y, Barallobre MJ, Dierssen M, Yu E, Herault Y, Arbones M, Janel N, et al. Excitation/inhibition balance and learning are modified by *Dyrk1a* gene dosage. *Neurobiol Dis*. 2014; 69:65–75.
32. Starbuck JM, Dutka T, Ratliff TS, Reeves RH, Richtsmeier JT. Overlapping trisomies for human chromosome 21 orthologs produce similar effects on skull and brain morphology of *Dp(16)1Yey* and *Ts65Dn* mice. *Am J Med Genet A*. 2014; 164A:1981–1990.
33. Block A, Ahmed MM, Dhanasekaran AR, Tong S, Gardiner KJ. Sex differences in protein expression in the mouse brain and their perturbations in a model of Down syndrome. *Biol Sex Differ*. 2015; 6:24.
34. Guedj F, Pennings JL, Massingham LJ, Wick HC, Siegel AE, Tantravahi U, Bianchi DW. An Integrated Human/Murine Transcriptome and Pathway Approach To Identify Prenatal Treatments For Down Syndrome. *Sci Rep*. 2016; 6:32353.
35. Patel A, Yamashita N, Ascaño M, Bodmer D, Boehm E, Bodkin-Clarke C, Ryu YK, Kuruvilla R. *RCAN1* links impaired neurotrophin trafficking to aberrant development of the sympathetic nervous system in Down syndrome. *Nat Commun*. 2015; 6:10119.
36. Peiris H, Duffield MD, Fadista J, Jessup CF, Kashmir V, Genders AJ, McGee SL, Martin AM, Saiedi M, Morton N, Carter R, Cousin MA, Kokotos AC, et al. A Syntenic Cross Species Aneuploidy Genetic Screen Links *RCAN1* Expression to beta-Cell Mitochondrial Dysfunction in Type 2 Diabetes. *PLoS Genet*. 2016; 12:e1006033.
37. Raveau M, Nakahari T, Asada S, Ishihara K, Amano K, Shimohata A, Sago H, Yamakawa K. Brain ventriculomegaly in Down syndrome mice is caused by *Pcp4* dose-dependent cilia dysfunction. *Hum Mol Genet*. 2017; 26:923–931.
38. Block A, Dhanasekaran AR, Ahmed M, Gardiner K. Abnormal protein profiles in hippocampus of mouse models of Down syndrome: similarities with Alzheimer's disease. *J Alzheimers Dis Parkinsonism*. 2014; 4:138–149.
39. Ng AP, Hu Y, Metcalf D, Hyland CD, Ierino H, Phipson B, Wu D, Baldwin TM, Kauppi M, Kiu H, Di Rago L, Hilton DJ, Smyth GK, Alexander WS. Early lineage priming by trisomy of *Erg* leads to myeloproliferation in a Down syndrome model. *PLoS Genet*. 2015; 11:e1005211.
40. Duchon A, Raveau M, Chevalier C, Nalesso V, Sharp AJ, Herault Y. Identification of the translocation breakpoints in the *Ts65Dn* and *Ts1Cje* mouse lines: relevance for modeling Down syndrome. *Mamm Genome*. 2011; 22:674–684.
41. Reinholdt LG, Ding Y, Gilbert GJ, Czechanski A, Solzak JP, Roper RJ, Johnson MT, Donahue LR, Lutz C, Davisson MT. Molecular characterization of the translocation breakpoints in the Down syndrome mouse model *Ts65Dn*. *Mamm Genome*. 2011; 22:685–691.
42. Chou ST, Opalinska JB, Yao Y, Fernandes MA, Kalota A, Brooks JS, Choi JK, Gewirtz AM, Danet-Desnoyers GA, Nemiroff RL, Weiss MJ. Trisomy 21 enhances human fetal erythro-megakaryocytic development. *Blood*. 2008; 112:4503–4506.
43. Tunstall-Pedoe O, Roy A, Karadimitris A, de la Fuente J, Fisk NM, Bennett P, Norton A, Vyas P, Roberts I. Abnormalities in the myeloid progenitor compartment in Down syndrome fetal liver precede acquisition of *GATA1* mutations. *Blood*. 2008; 112:4507–4511.
44. Roy A, Cowan G, Mead AJ, Filippi S, Bohn G, Chaidos A, Tunstall O, Chan JK, Choolani M, Bennett P, Kumar S, Atkinson D, Wyatt-Ashmead J, et al. Perturbation of fetal liver hematopoietic stem and progenitor cell development by trisomy 21. *Proc Natl Acad Sci U S A*. 2012; 109:17579–17584.
45. Gribble SM, Wiseman FK, Clayton S, Prigmore E, Langley E, Yang F, Maguire S, Fu B, Rajan D, Sheppard O, Scott C, Hauser H, Stephens PJ, et al. Massively parallel sequencing reveals the complex structure of an irradiated human chromosome on a mouse background in the *Tc1* model of Down syndrome. *PLoS One*. 2013; 8:e60482.
46. Birger Y, Goldberg L, Chlon TM, Goldenson B, Muler I, Schiby G, Jacob-Hirsch J, Rechavi G, Crispino JD, Izraeli S. Perturbation of fetal hematopoiesis in a mouse model of Down syndrome's transient myeloproliferative disorder. *Blood*. 2013; 122:988–998.
47. Calligaris R, Bottardi S, Cogoi S, Apezteguia I, Santoro C. Alternative translation initiation site usage results in two functionally distinct forms of the *GATA-1* transcription factor. *Proc Natl Acad Sci U S A*. 1995; 92:11598–11602.
48. Hitzler JK, Cheung J, Li Y, Scherer SW, Zipursky A. *GATA1* mutations in transient leukemia and acute megakaryoblastic leukemia of Down syndrome. *Blood*. 2003; 101:4301–4304.
49. Mundschau G, Gurbuxani S, Gamis AS, Greene ME, Arceci RJ, Crispino JD. Mutagenesis of *GATA1* is an initiating event in Down syndrome leukemogenesis. *Blood*. 2003; 101:4298–4300.
50. Rainis L, Bercovich D, Strehl S, Teigler-Schlegel A, Stark B, Trka J, Amariglio N, Biondi A, Muler I, Rechavi G, Kempinski H, Haas OA, Izraeli S. Mutations in exon 2 of *GATA1* are early events in megakaryocytic malignancies associated with trisomy 21. *Blood*. 2003; 102:981–986.
51. Xu G, Nagano M, Kanezaki R, Toki T, Hayashi Y, Taketani T, Taki T, Mitui T, Koike K, Kato K, Imaizumi M, Sekine I, Ikeda Y, et al. Frequent mutations in the *GATA-1* gene in the transient myeloproliferative disorder of Down syndrome. *Blood*. 2003; 102:2960–2968.
52. Ramirez-Solis R, Davis AC, Bradley A. Gene targeting in embryonic stem cells. *Methods Enzymol*. 1993; 225:855–878.

53. Bradley A. Production and analysis of chimaeric mice. Teratocarcinomas and Embryonic Stem Cells - A Practical Approach, E. Robertson, Editor. IRL Press: Oxford. 1987:113–151.
54. Abuin A, Bradley A. Recycling selectable markers in mouse embryonic stem cells. Mol Cell Biol. 1996; 16:1851–1856.
